# Supplementary material
Source: Research Square preprint supplement (doi:10.21203/rs.3.rs-9159548/v1)
Supplement: Supplementary file 1 [file 068dda303113cee20f2b676a.docx]

**Supplementary Information (SI)**

**“Probabilistic assessment of uncertainty of carbon capture and storage for achieving Paris-Aligned goals”**

This document presents additional information to support the results of the main article. This supplementary material includes a comparison of the model results with selected IPCC Sixth Assessment Report (AR6) ensembles (section 1); and the ensembles results compared with the parameters introduced (section 2).

**1. IPCC Sixth Assessment Report ensembles comparison**

In this article we utilize the IPCC Sixth Assessment Report (AR6) as a frame of reference for our 1.5ºC and 2.0ºC ensemble results. In the AR6, emissions scenarios are categorized by their probability of meeting specific temperature thresholds throughout the 21st century. Specifically, we focus on category 2 (C2) that represents pathways that return global warming to 1.5°C by 2100 with a median likelihood (>50%) after a high temporary overshoot, and category 3 (C3) that consists of pathways that are likely (>67%) to limit warming to below 2°C throughout the entire century.

An overview of the deployment scale of carbon sequestration in the C2 and C3 scenarios can be assessed in Table 1, which summarizes the cumulative sequestration of selected technologies or group of technologies.

| **Table 1 | Cumulative sequestration of selected technologies in C2 and C3 ensembles** | | | |
| --- | --- | --- | --- |
| **Ensemble** | **Technology** | **Cumulative** | **Scenarios** | |
| C2 | CCS total | 708.03[[1]](#footnote-1)*  (550.56;1033.43) | 131 | |
| BECCS | 464.66  (292.10;624.08) | 122 | |
| A/R | 219.83  (207.32;311.83) | 64 | |
| Other CDR | 226.70  (83.35; 340.13) | 24 | |
| **Combined** | **957.24  (741.23;1148.34)** | **133** | |
| C3 | CCS total | 591.90  (486.17;774.42) | 310 | |
| BECCS | 291.83  (244.88;412.39) | 294 | |
| A/R | 206.76  (75.55;214;51) | 120 | |
| Other CDR | 120.23  (14.50;199.05) | 91 | |
| **Combined** | **842.49  (611.04;981.21)** | **310** | |
| Note: “CCS total” encompass carbon capture and storage from fossil and biomass sources; bioenergy with carbon capture and storage (BECCS); “Other CDR” encompass biochar, enhanced weathering, and direct air capture; “Combined” encompass all carbon sequestration technologies; “Cumulative” is the estimation of cumulative sequestration between 2026 - 2100 in GtCO2; “Scenarios” column account for the frequency of the technology in the ensemble. Source: adapted from AR6 scenarios database35. | | | |

Figure 1 presents a comparative assessment of selected carbon sequestration technologies across 1.5°C and 2.0°C ensembles derived from the C2 and C3 scenario categories35.


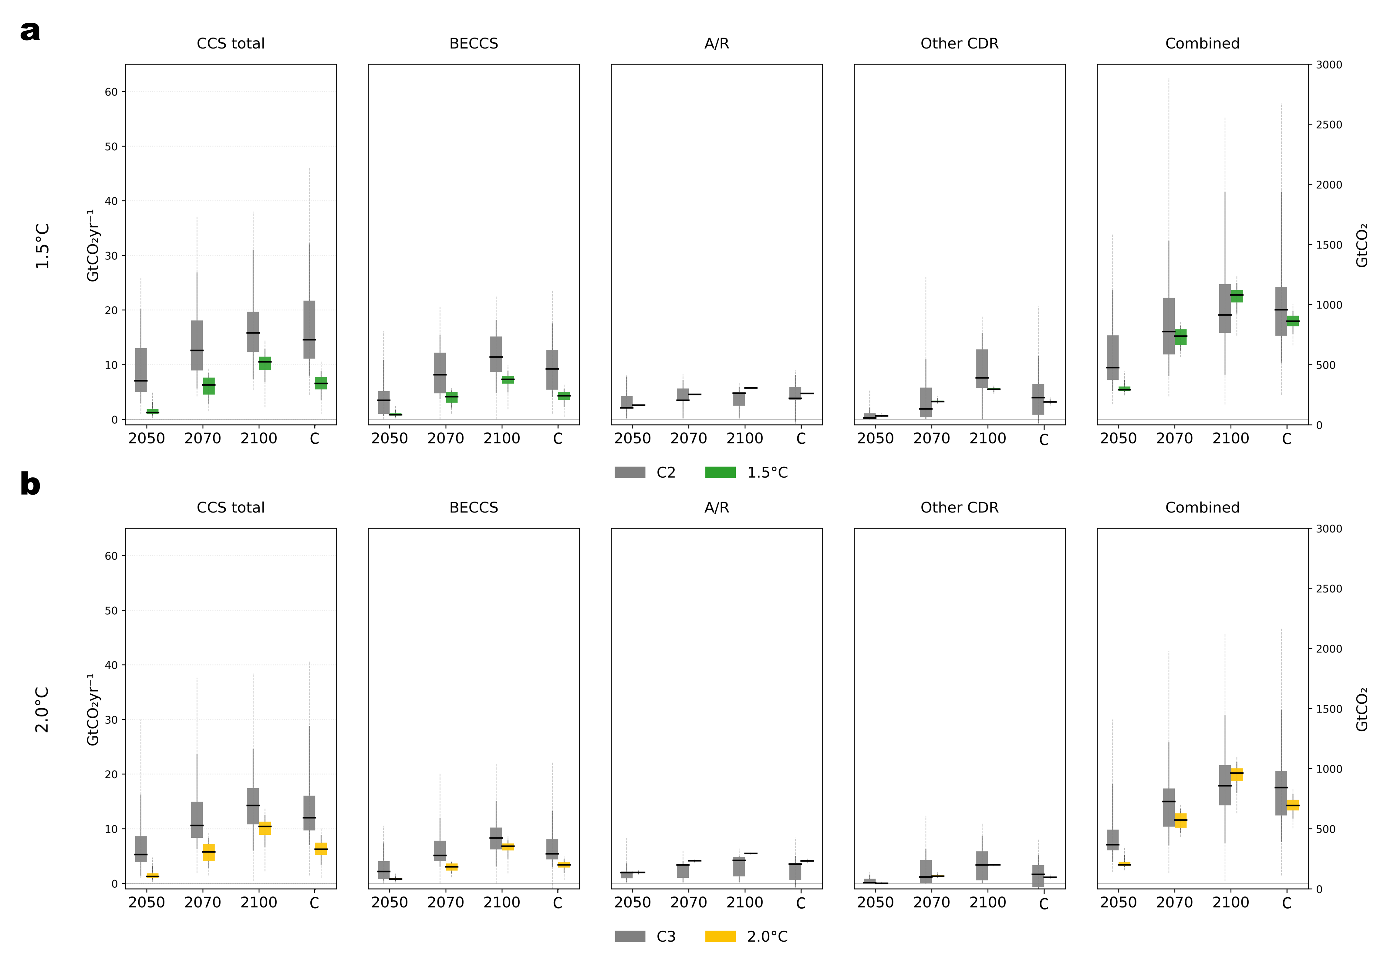


**Figure 1 | Comparison of selected sequestration technologies**. **a**, **b**, Boxplots (median, box P25-P75, whiskers P5-P95, and dashed lines with full range) of global selected carbon sequestration technologies in GtCO2yr-1 for the 1.5°C and 2.0°C (1,250 scenarios per ensemble), and C2 and C3 ensembles for the years 2050, 2070 and 2100 (left y-axis) and the respective cumulative (C) sequestration between 2026 and 2100 in GtCO2 (right y-axis). Categories include CCS total (carbon capture and storage from fossil and biomass sources), bioenergy with carbon capture and storage (BECCS), afforestation/reforestation (A/R), other carbon dioxide removal (CDR) comprised of biochar, enhanced weathering, and direct air capture, and the “Combined” aggregate. Results are shown for (**a**) comparison between 1.5°C and C2 ensembles and (**b**) comparison between 2.0°C and C3 ensembles.

Figure 2 presents a comparative assessment of primary energy sources across 1.5°C and 2.0°C ensembles derived from the C2 and C3 scenario categories35.


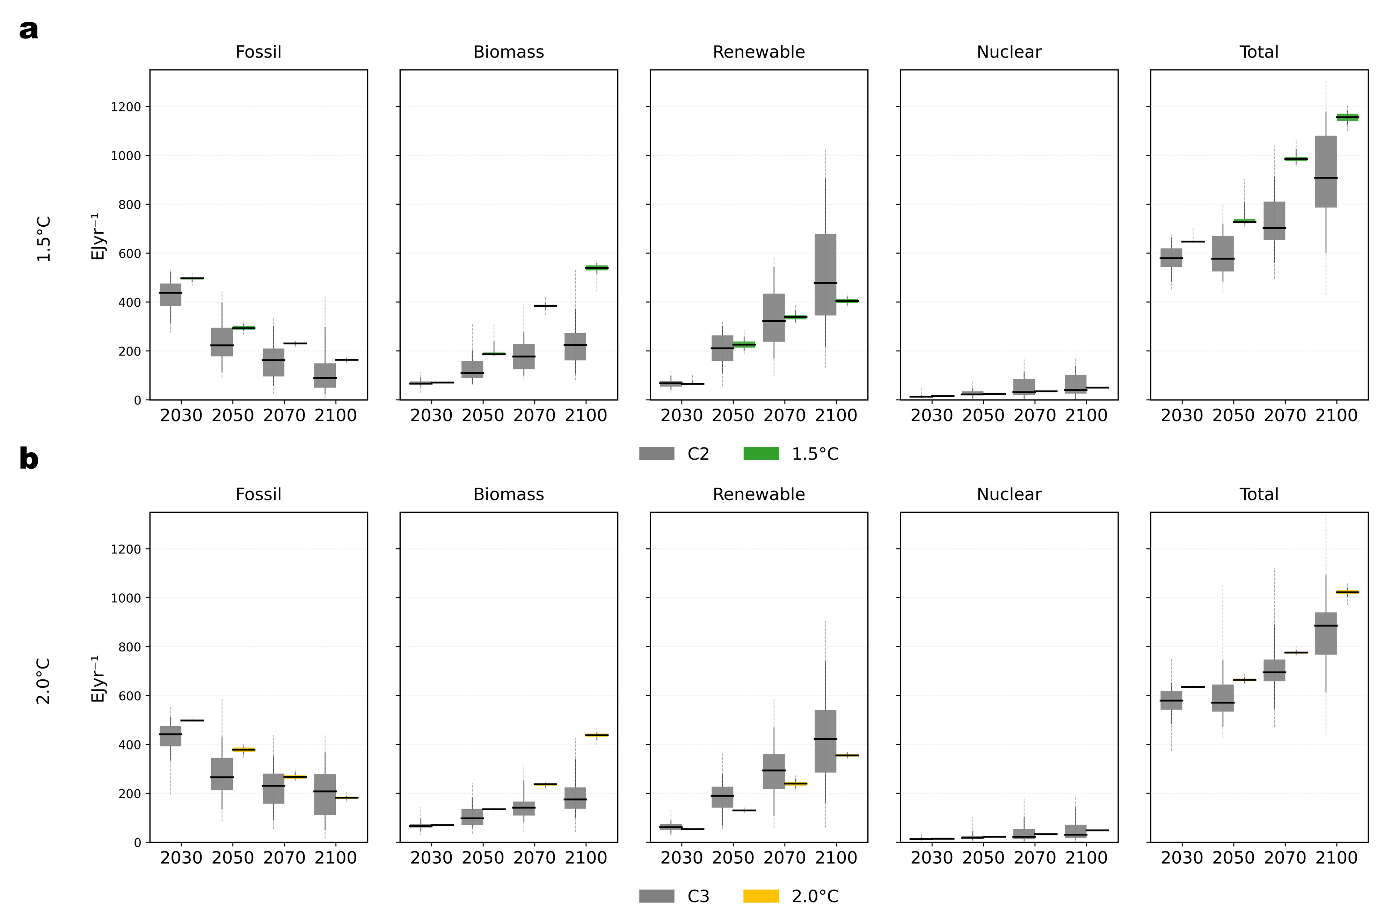


**Figure 2 | Comparison of primary energy. a, b**, Boxplots (median, box P25-P75, whiskers P5-P95, and dashed lines with full range) in EJy-1 of global primary energy sources for the 1.5°C and 2.0°C (1,250 scenarios per ensemble), and C2 and C3 ensembles for the years 2030, 2050, 2070 and 2100. Primary energy categorized into fossil, biomass, renewables (representing non-biomass renewable sources), and nuclear. Results are shown for (**a**) comparison between 1.5°C and C2 ensembles and (**b**) comparison between 2.0°C and C3 ensembles.

**2. Carbon injection and geological storage utilization**

In this section we present the results of carbon injection and geological storage utilization compared to the limits defined by the parameters introduced in the ensembles. Figure 3 illustrates the distribution of global CCS limits and carbon injection for the 1.5°C and 2.0°C ensembles. The results illustrated how our model prefers others technologies creating an increasing gap between maximum CCS limit and maximum scenario utilization that start to be more noticeable after 2050, although the median difference remained less extreme.

**
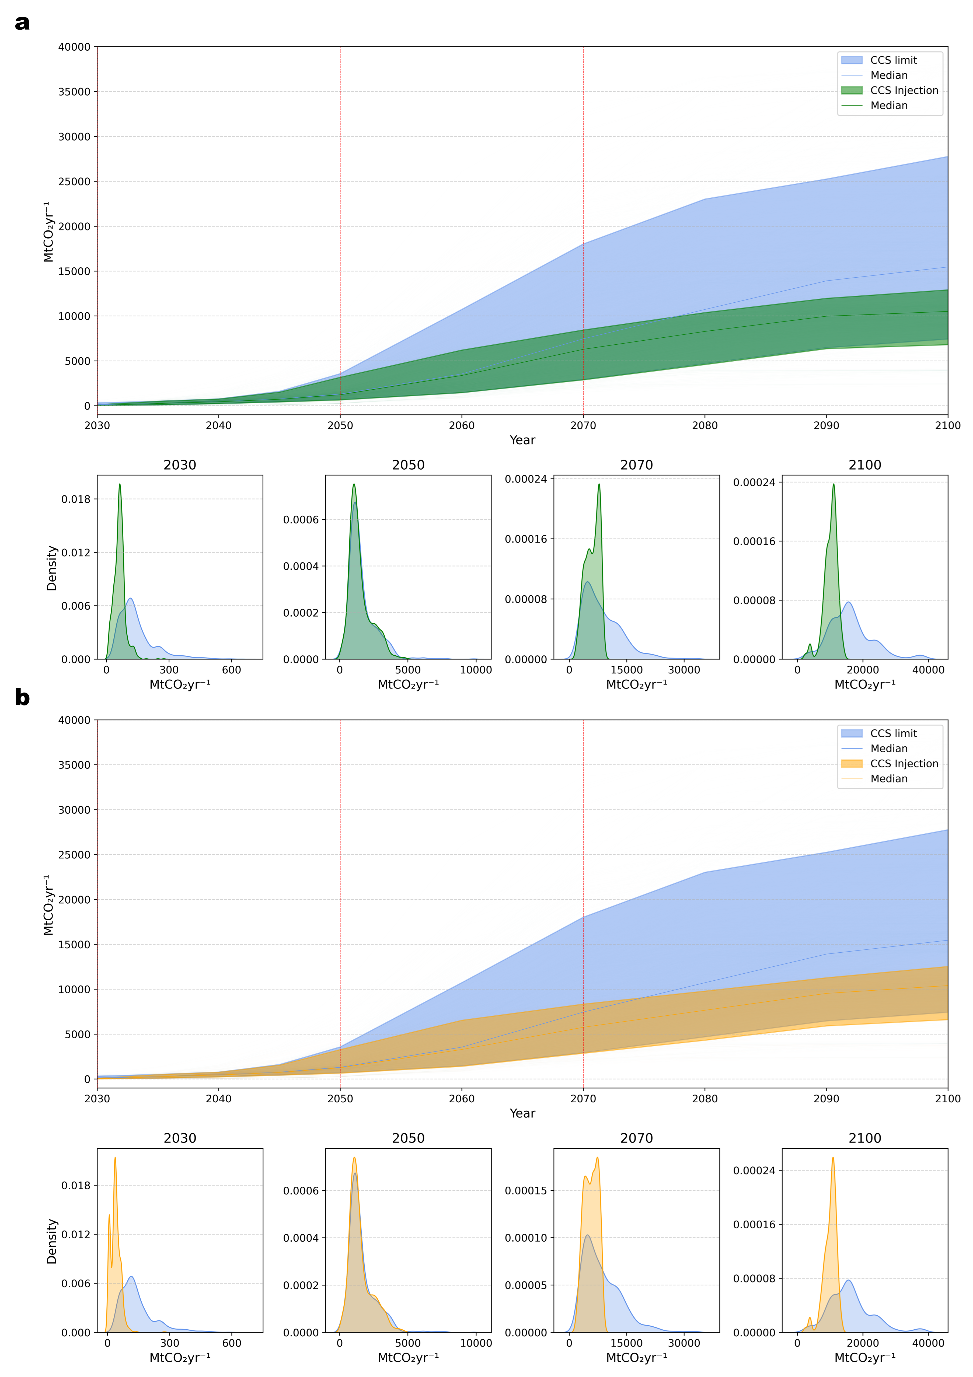
**

**Figure 3 | Global CCS capacity limits and injection for 1.5°C and 2.0°C ensembles. a**, **b**, Time-series of global CCS capacity limits (blue) and injections in MtCO2yr-1 for 1.5°C (green) and 2.0°C (yellow) ensembles (1,250 scenarios per ensemble). Solid central lines represent the ensemble median; shaded areas denote the central 90% quantile range (P5-P95); bottom subpanels display the kernel density estimation (KDE) for emissions at the 2030, 2050, 2070, and 2100 milestones with lines and shaded areas in density curves representing the 100% quantile. Results are shown for the (**a**) 1.5ºC and (**b**) 2.0ºC ensembles.

The geological carbon injection by region for the 1.5ºC and 2.0ºC ensembles shown in Figure 4 quantify the annual injection relative to the regional carbon sequestration limits assigned within the individual scenarios.


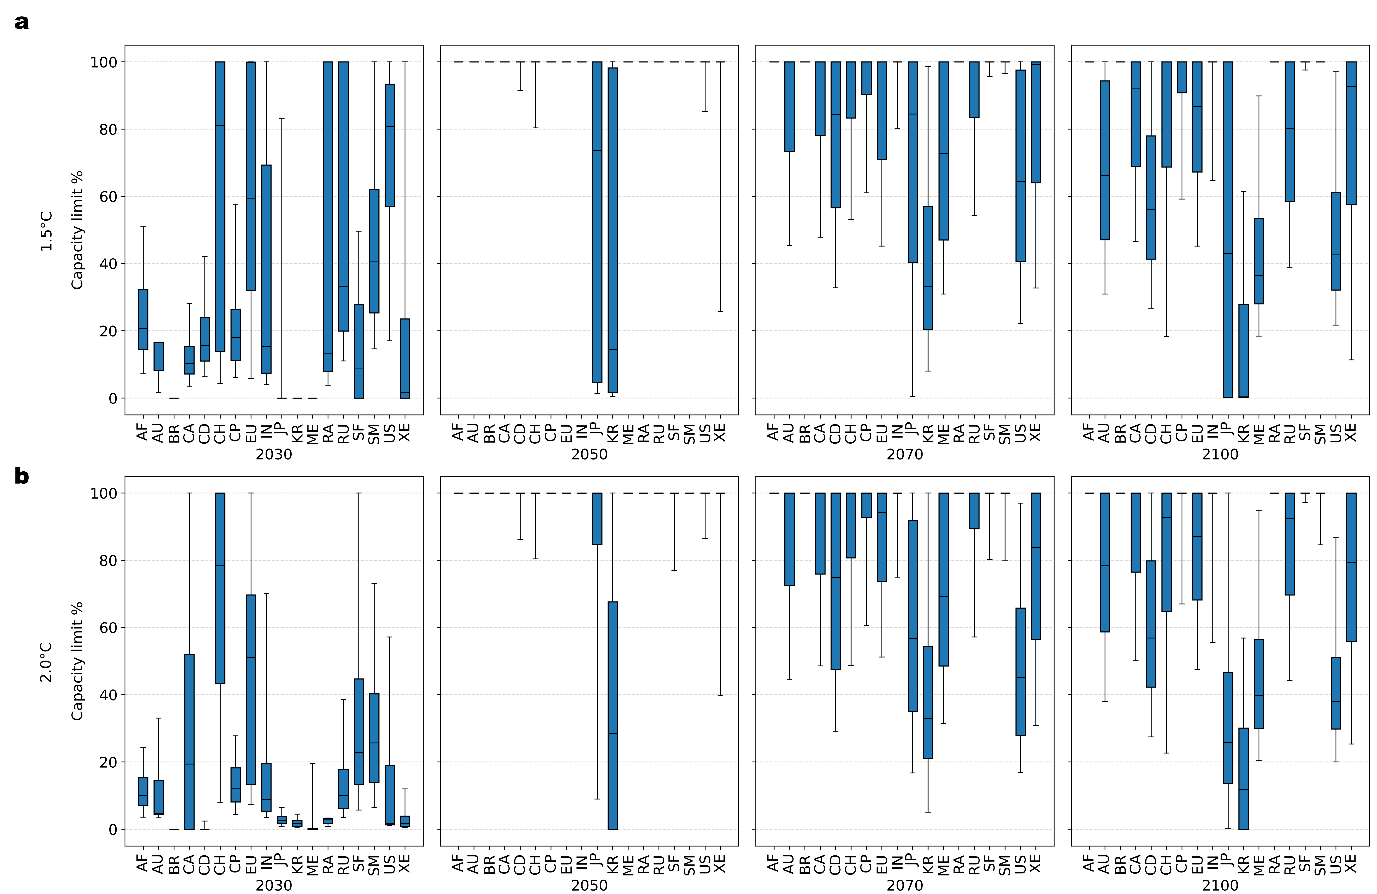


**Figure 4 | Regional geological carbon injection rates.** **a**, **b**, Boxplots (median, box P25-P75, and whiskers P5-P95) represent the distribution of the regional sequestration limit utilized in the years 2030, 2050, 2070, and 2100 per scenario. Results are shown for the (**a**) 1.5ºC and (**b**) 2.0ºC ensembles across all 18 regions.

Similarly, the geological carbon storage utilization in Figure 5 illustrates the total cumulative storage used between 2026 and 2100 as a percentage of the available geological capacity, within individual scenarios.


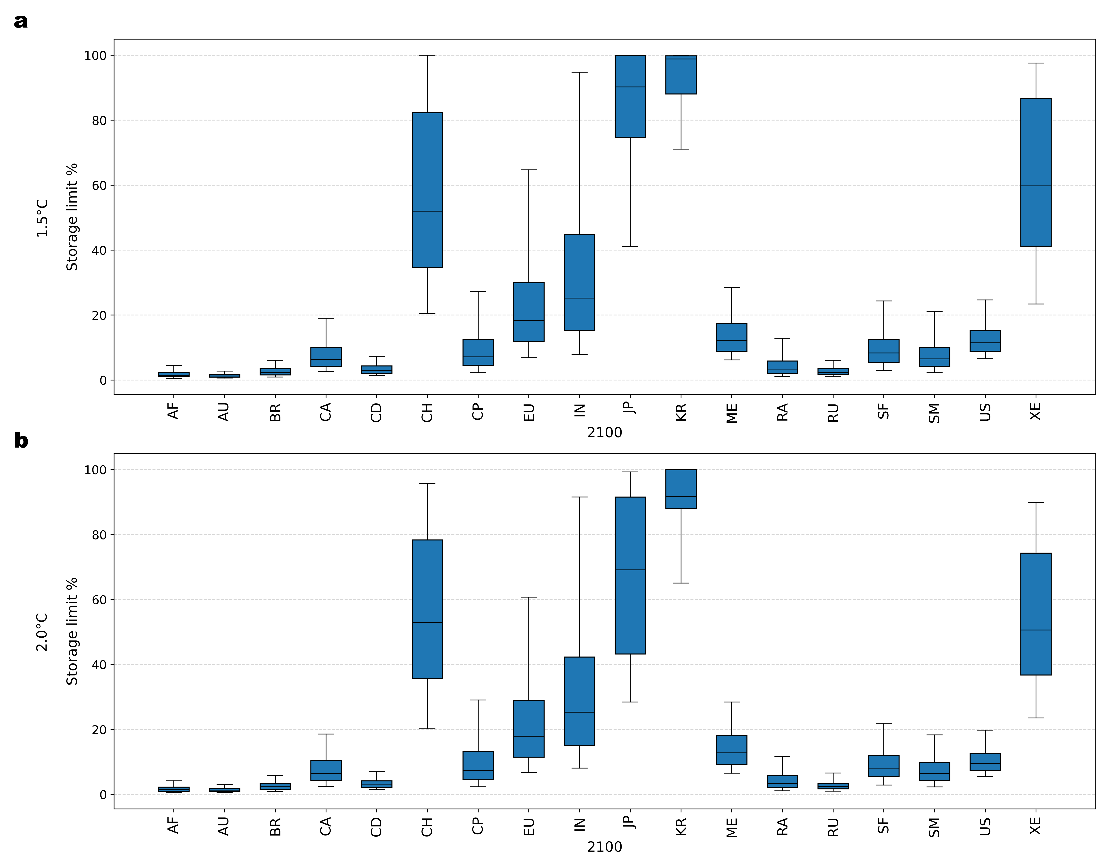


**Figure 5 | Cumulative regional geological carbon storage utilization by 2100. a**, **b**, Boxplots (median, box P25-P75, and whiskers P5-P95) represent regional distribution of cumulative carbon storage sequestered between 2026 to 2100 expressed as a percentage of total storage capacity per scenario. Results are shown for the (**a**) 1.5ºC and (**b**) 2.0ºC ensembles across all 18 regions.

**References**

1. Intergovernmental Panel on Climate Change. *Climate Change 2022: Mitigation of Climate Change*. (Cambridge University Press, 2022).

2. UNFCC. *Conference of the Parties: Adoption of the Paris Agreement.* (Paris, France, 2015).

3. Schleussner, C.-F. *et al.* Overconfidence in climate overshoot. *Nature* **634**, 366–373 (2024).

4. Kazlou, Y. T., Cherp, A. & Jewell, J. Feasible deployment of carbon capture and storage and the requirements of climate targets. *Nat. Clim. Chang.* **14**, 1047–1055 (2024).

5. Riahi, K. & et al. Cost and attainability of meeting stringent climate targets without overshoot. *Nat. Clim. Chang.* **11**, 1063–1069 (2021).

6. Tavoni, M. *et al.* Implications of overshoot for climate mitigation strategies. *Nature Climate Change* Preprint at https://doi.org/10.1038/s41558-026-02563-7 (2026).

7. Warszawski, L. *et al.* All options, not silver bullets, needed to limit global warming to 1.5 ◦C: A scenario appraisal. *Environmental Research Letters* **16**, (2021).

8. Chiquier, S., Fajardy, M. & Dowell, N. Mac. CO2 removal and 1.5 °C: what, when, where, and how? *Energy Advances* 524–561 (2022) doi:10.1039/d2ya00108j.

9. Fuhrman, J. & et al. Rate and growth limits for carbon capture and storage. *Environmental Research Letters* **20**, 64034 (2025).

10. Lane, J., Greig, C. & Garnett, A. Uncertain storage prospects create a conundrum for carbon capture and storage ambitions. *Nat. Clim. Chang.* **11**, 925–936 (2021).

11. Smith, P. *et al.* Biophysical and economic limits to negative CO2 emissions. *Nature Climate Change* vol. 6 42–50 Preprint at https://doi.org/10.1038/nclimate2870 (2016).

12. Strefler, J. & et al. Between Scylla and Charybdis: delayed mitigation narrows the passage between large-scale CDR and high costs. *Environmental Research Letters* **13**, 44015 (2018).

13. Roe, S. *et al.* Land-based measures to mitigate climate change: Potential and feasibility by country. *Glob. Chang. Biol.* **27**, 6025–6058 (2021).

14. Fuss, S. & et al. Betting on negative emissions. *Nat. Clim. Chang.* **4**, 850–853 (2014).

15. Anderson, K. & et al. Controversies of carbon dioxide removal. *Nat. Rev. Earth Environ.* **4**, 808–814 (2023).

16. Smith, E. *et al.* The cost of CO2 transport and storage in global integrated assessment modeling. *International Journal of Greenhouse Gas Control* **109**, (2021).

17. Middleton, R. S. & Yaw, S. The cost of getting CCS wrong: uncertainty, infrastructure design and stranded CO_2. *International Journal of Greenhouse Gas Control* **70**, 1–11 (2018).

18. Streck, C. & et al. Considering durability in carbon dioxide removal strategies for climate change mitigation. *Climate Policy* **25**, 1–9 (2025).

19. Gidden, M. J. & et al. A prudent planetary limit for geologic carbon storage. *Nature* **645**, 124–132 (2025).

20. Grant, N. & et al. The policy implications of an uncertain carbon dioxide removal potential. *Joule* **5**, 2593–2605 (2021).

21. Weyant, J. Some contributions of integrated assessment models of global climate change. *Rev. Environ. Econ. Policy* **11**, 115–137 (2017).

22. van Beek, L., Hajer, M., Pelzer, P., van Vuuren, D. & Cassen, C. Anticipating futures through models: the rise of Integrated Assessment Modelling in the climate science-policy interface since 1970. *Global Environmental Change* **65**, (2020).

23. Cointe, B., Cassen, C. & Nadaï, A. Organising Policy-Relevant Knowledge for Climate Action: Integrated Assessment Modelling, the IPCC, and the Emergence of a Collective Expertise on Socioeconomic Emission Scenarios. *Science and Technology Studies XX(X)* **32**, (2019).

24. Tavoni, M. & Valente, G. Uncertainty in Integrated Assessment Modeling of Climate Change. *Perspectives on Science* **30**, 321–351 (2022).

25. Gambhir, A., Butnar, I., Li, P. H., Smith, P. & Strachan, N. A review of criticisms of integrated assessment models and proposed approaches to address these, through the lens of BECCs. *Energies (Basel).* **12**, (2019).

26. Cooke, R. M. Uncertainty analysis comes to integrated assessment models for climate change...and conversely. *Clim. Change* **117**, 467–479 (2013).

27. Bosetti, V. *et al.* Sensitivity to energy technology costs: A multi-model comparison analysis. *Energy Policy* **80**, 244–263 (2015).

28. Huard, D., Fyke, J., Capellán-Pérez, I., Matthews, H. D. & Partanen, A. I. Estimating the Likelihood of GHG Concentration Scenarios From Probabilistic Integrated Assessment Model Simulations. *Earths Future* **10**, (2022).

29. Marcucci, A., Panos, E., Kypreos, S. & Fragkos, P. Probabilistic assessment of realizing the 1.5 °C climate target. *Appl. Energy* **239**, 239–251 (2019).

30. Lontzek, T. S., Cai, Y., Judd, K. L. & Lenton, T. M. *Stochastic Integrated Assessment of Climate Tipping Points Calls for Strict Climate Policy*.

31. Gillingham, K. *et al.* *Modeling Uncertainty in Integrated Assessment of Climate Change: A Multi-Model Comparison*. http://globalchange.mit.edu/sponsors/all.Bosettiacknowledges (2018).

32. Guivarch, C. *et al.* Using large ensembles of climate change mitigation scenarios for robust insights. *Nature Climate Change* vol. 12 428–435 Preprint at https://doi.org/10.1038/s41558-022-01349-x (2022).

33. Beath, H. *et al.* A weighting framework to improve the use of emissions scenario ensembles of opportunity. *Nat. Clim. Chang.* https://doi.org/10.1038/s41558-026-02565-5 (2026) doi:10.1038/s41558-026-02565-5.

34. Calvin, K. *et al.* *IPCC, 2023: Climate Change 2023: Synthesis Report. Contribution of Working Groups I, II and III to the Sixth Assessment Report of the Intergovernmental Panel on Climate Change [Core Writing Team, H. Lee and J. Romero (Eds.)]. IPCC, Geneva, Switzerland.* https://www.ipcc.ch/report/ar6/syr/ (2023) doi:10.59327/IPCC/AR6-9789291691647.

35. International Institute for Applied Systems Analysis. AR6 Scenarios Database hosted by IIASA. Preprint at https://data.ece.iiasa.ac.at/ar6/ (2021).

36. Bastin, J.-F. *et al.* *The Global Tree Restoration Potential Downloaded From*. *Science* vol. 365 http://science.sciencemag.org/ (2019).

37. Griscom, B. W. *et al.* Natural climate solutions. *Proc. Natl. Acad. Sci. U. S. A.* **114**, 11645–11650 (2017).

38. Zanon-Zotin, M., Baptista, L. B., Rochedo, P. R. R., Szklo, A. & Schaeffer, R. Industrial sector pathways to a well-below 2 °C world: A global integrated assessment perspective. *Appl. Energy* **381**, (2025).

39. Müller-Casseres, E. & et al. International shipping in a world below 2^C. *Nat. Clim. Chang.* **14**, 600–607 (2024).

40. Kann, A. & Weyant, J. P. *Approaches for Performing Uncertainty Analysis in Large-Scale Energy/Economic Policy Models*. *Environmental Modeling and Assessment* vol. 5 (2000).

41. Kroese, D. P. *Monte Carlo Methods*. http://www.maths.uq.edu.au/ (2011).

42. Gentle, J. E., Hardle, Wolfgang. & Mori, Yuichi. Handbook of computational statistics : concepts and methods. in (2004).

43. Shields, M. D. & Zhang, J. The generalization of Latin hypercube sampling. *Reliab. Eng. Syst. Saf.* **148**, 96–108 (2016).

44. Riahi, K. & et al. The shared socioeconomic pathways and their energy, land use, and greenhouse gas emissions implications: an overview. *Global Environmental Change* **42**, 153–168 (2017).

45. Intergovernmental Panel on Climate Change (IPCC). *Climate Change 2021 – The Physical Science Basis*. *Climate Change 2021 – The Physical Science Basis* (Cambridge University Press, 2023). doi:10.1017/9781009157896.

46. Global Energy Monitor. Global Oil Infrastructure Tracker. Preprint at (2025).

47. World Bank. World Development Indicators (WDI) Database. Preprint at (2025).

48. International Energy Agency. IEA CCUS Database. Preprint at (2025).

49. Fuss, S. & et al. Negative emissions—Part 2: Costs, potentials and side effects. *Environmental Research Letters* **13**, 63002 (2018).

50. Popp, A. *et al.* Land-use futures in the shared socio-economic pathways. *Global Environmental Change* **42**, 331–345 (2017).

1. * Hereafter, values are reported as median (Q1; Q3), where Q1 and Q3 correspond to the 25th (P25) and 75th (P75) percentiles, respectively, defining the interquartile range (IQR), which encompasses the central 50% of the distribution. [↑](#footnote-ref-1)
